# Supplementary material for: Impact of Constant Versus Fluctuating Temperatures on the Development and Life History Parameters of Aldrichina grahami (Diptera: Calliphoridae)
Source: MDPI journal article supplement (doi:10.3390/insects10070184), 2019-06-26
Supplement: s1 [file s1]

Article

# Impact of Constant Versus Fluctuating Temperatures on the Development and Life History Parameters of *Aldrichina grahami* (Diptera: Calliphoridae)

Wei Chen <sup>1,†</sup>, Li Yang <sup>1,†</sup>, Lipin Ren <sup>1</sup>, Yanjie Shang <sup>1</sup>, Shiwen Wang <sup>2</sup> and Yadong Guo <sup>1,\*</sup>

<sup>1</sup> Department of Forensic Science, School of Basic Medical Sciences, Central South University, Changsha 410013, China; chen\_wei93@126.com (W.C.); yangli1015@csu.edu.cn (L.Y.); renlp87@126.com (L.R.); shangyj@csu.edu.cn (Y.S.)

<sup>2</sup> Department of Forensic Science, School of Basic Medical Sciences, Xinjiang Medical University, Urumqi 830011, China; wsw180325@126.com

\* Correspondence: gdy82@126.com

† These two authors contributed equally to this work.

Received: 7 May 2019; Accepted: 18 June 2019; Published: date

## Supplementary Materials

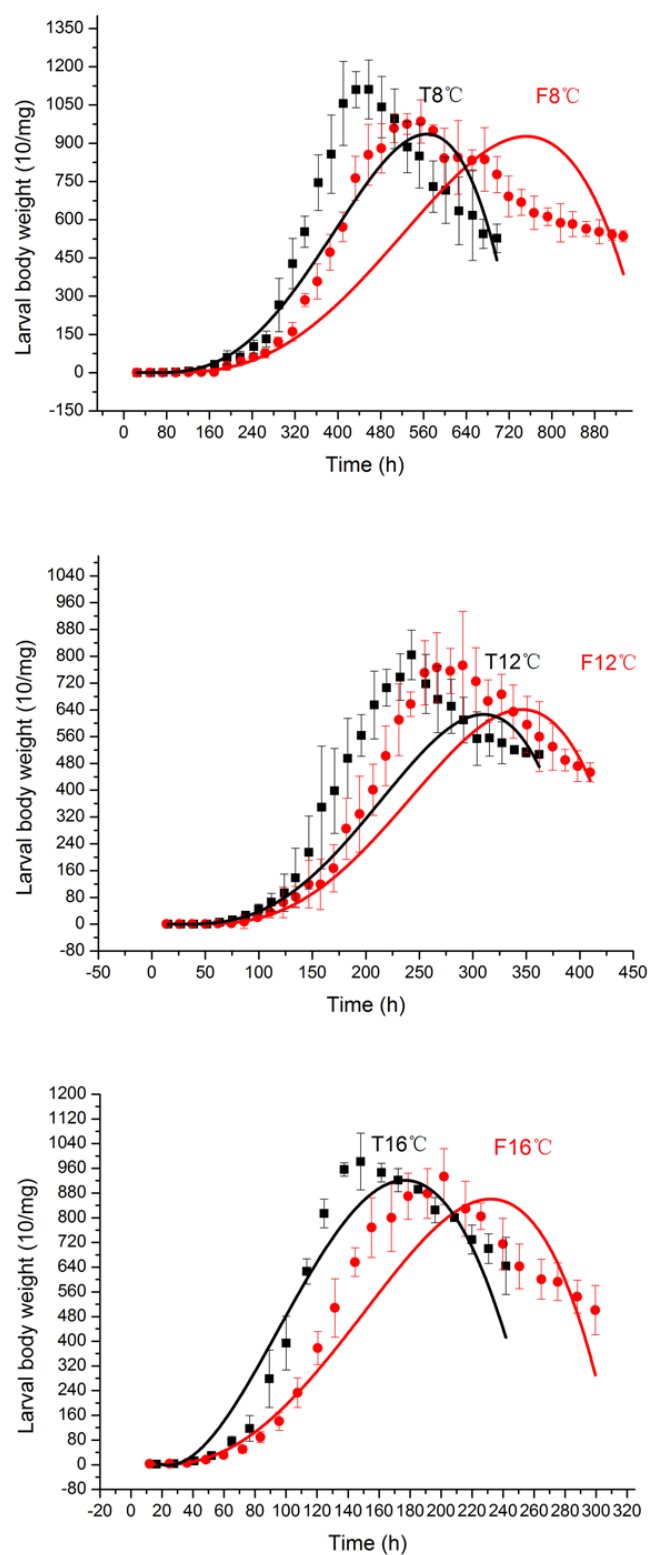

**Figure S1.** Change in larval body weight with time was shown in three groups constant versus fluctuating temperatures. The curve represents the fitting of larval body weight and time.

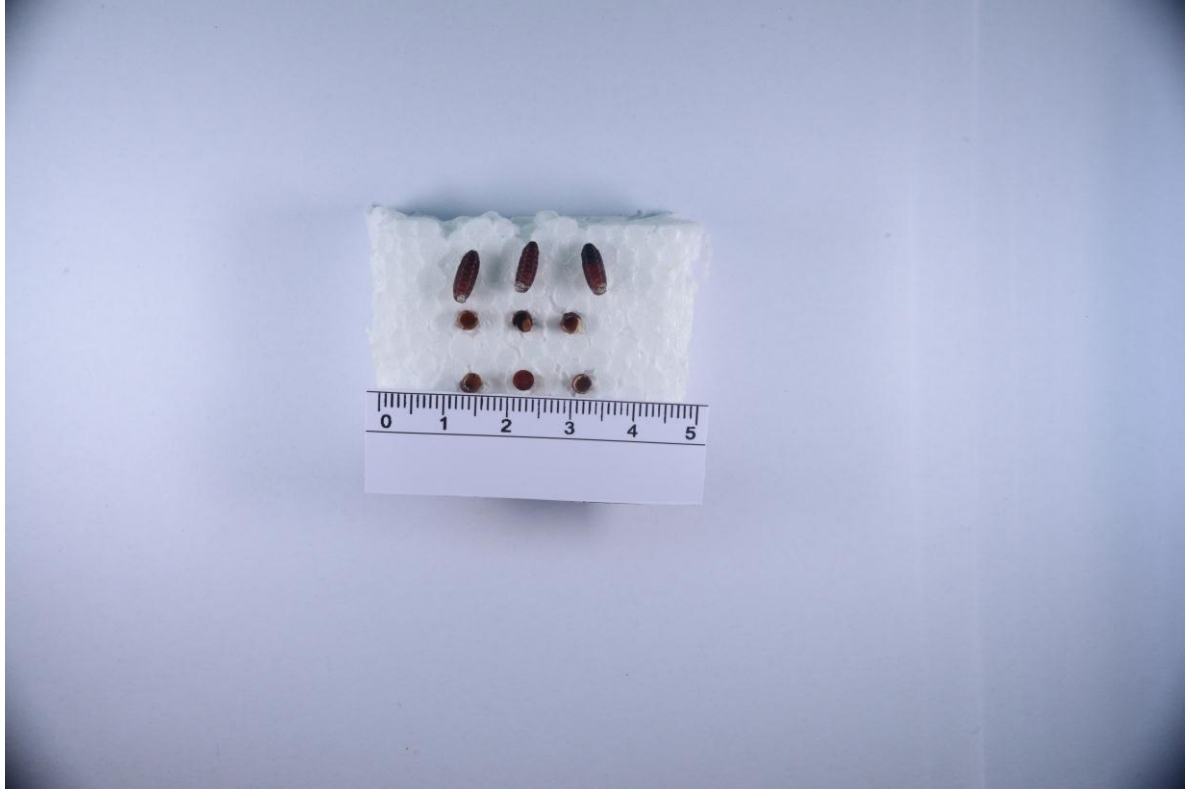

**Figure S2.** In T8 °C and F12 °C adults were failing to make eclosion, and the pupa were vacuous.

**Table 1.** Curve fitting equation, degrees of freedom (df), and coefficients of determination ( $R^2$ ) of the relationship between the body weight (W) (mg) of *A. grahamsi* larvae and the time after hatching (T) (h) at three fluctuating temperatures 6–12 °C (F8 °C), 10–16 °C (F12 °C), 14–20 °C (F16 °C), and constant temperatures 8 °C (T8 °C), 12 °C (T12 °C), 16 °C (T16 °C).

| Temperature (°C) | Equation                                                    | df | $R^2$ |
|------------------|-------------------------------------------------------------|----|-------|
| F8               | $w = -1.837 + 0.139T - 0.00252T^2 + 1.5E-5T^3 - 1.3E-8T^4$  | 34 | 0.863 |
| T8               | $w = -2.348 + 0.197T - 0.00445T^2 + 3.5E-5T^3 - 3.9E-8T^4$  | 24 | 0.879 |
| F12              | $w = -2.248 + 0.331T - 0.01082T^2 + 1.2E-4T^3 - 2.1E-7T^4$  | 29 | 0.864 |
| T12              | $w = -1.320 + 0.189T - 0.00847T^2 + 1.3E-4T^3 - 2.8E-7T^4$  | 25 | 0.970 |
| F16              | $w = 15.269 - 1.116T - 0.01907T^2 + 1.7E-4T^3 - 7.0E-7T^4$  | 20 | 0.942 |
| T16              | $w = 86.127 - 7.780T - 0.019058T^2 - 8.0E-4T^3 - 7.0E-7T^4$ | 15 | 0.988 |
